# Supplementary material
Source: publisher figshare collection journal article supplement (https://acs.figshare.com/ndownloader/files/5689881)
Supplement: Supplementary file 1 [file 5689881]

# ic001349q.cif

data_global

# "Synthesis of Paramagnetic Tetranuclear Rhodium and Iridium Complexes
# with the 2,6-Pyridinedithiolate Ligand. Redox-Induced Degradation to
# Unusual Diamagnetic Triiridium Compounds"
#
# by Miguel A. Casado, Jesus J. Perez-Torrente, Jose A. Lopez,
# Miguel A. Ciriano, Pablo J. Alonso, Fernando J. Lahoz and Luis A. Oro.
#
# submitted to Inorganic Chemistry
#
# MS No: IC001349Q
#
#----------------------------------------------------------------------
#
# Person for contact
_publ_contact_author
;
   Dr. Fernando J. Lahoz
   Departamento de Qu\'imica Inorg\'anica - I.C.M.A.
   Facultad de Ciencias
   Universidad de Zaragoza - C.S.I.C.
   50009 Zaragoza, Spain
;
_publ_contact_author_email        lahoz@posta.unizar.es
#----------------------------------------------------------------------
#Publication details
loop_
_publ_author_name
                      'Casado, M.A.'
                      'P\'erez-Torrente, J.J.'
                      'L\'opez, J.A.'
                      'Ciriano, M.A.'
                      'Alonso, P.J.'
                      'Lahoz, F.J.'
                      'Oro, L.A.'

_journal_name_full   'Inorganic Chemistry'
_journal_volume      ?
_journal_page_first  ?
_journal_page_last   ?
_journal_year        ?
#----------------------------------------------------------------------
# Data for compound 5b


data_compound5b

_audit_creation_method            SHELXL-97
_chemical_name_systematic
;
  ?
;
_chemical_name_common             ?
_chemical_melting_point           ?
_chemical_formula_moiety           '(C34 H42 Ir3 N2 S4 +), (B F4 -)'
_chemical_formula_sum              'C34 H42 B F4 Ir3 N2 S4'
_chemical_formula_weight          1270.35

loop_
  _atom_type_symbol
  _atom_type_description
  _atom_type_scat_dispersion_real
  _atom_type_scat_dispersion_imag
  _atom_type_scat_source
  'C'  'C'   0.0033   0.0016
  'International Tables Vol C Tables 4.2.6.8 and 6.1.1.4'
  'H'  'H'   0.0000   0.0000
  'International Tables Vol C Tables 4.2.6.8 and 6.1.1.4'
  'B'  'B'   0.0013   0.0007
  'International Tables Vol C Tables 4.2.6.8 and 6.1.1.4'
  'N'  'N'   0.0061   0.0033
  'International Tables Vol C Tables 4.2.6.8 and 6.1.1.4'
  'F'  'F'   0.0171   0.0103
  'International Tables Vol C Tables 4.2.6.8 and 6.1.1.4'
  'S'  'S'   0.1246   0.1234
  'International Tables Vol C Tables 4.2.6.8 and 6.1.1.4'
  'Ir'  'Ir'  -1.4442   7.9887
  'International Tables Vol C Tables 4.2.6.8 and 6.1.1.4'

_symmetry_cell_setting            Monoclinic
_symmetry_space_group_name_H-M    'P 1 21/c 1'

loop_
  _symmetry_equiv_pos_as_xyz
  'x, y, z'
  '-x, y+1/2, -z+1/2'
  '-x, -y, -z'
  'x, -y-1/2, z-1/2'

_cell_length_a                    7.9234(9)
_cell_length_b                    22.002(4)
_cell_length_c                    19.786(3)
_cell_angle_alpha                 90.00
_cell_angle_beta                  96.395(14)
_cell_angle_gamma                 90.00
_cell_volume                      3427.8(9)
_cell_formula_units_Z             4
_cell_measurement_temperature     173(2)
_cell_measurement_reflns_used     46
_cell_measurement_theta_min       12.5
_cell_measurement_theta_max       16

_exptl_crystal_description       'irregular block'
_exptl_crystal_colour             dark-purple
_exptl_crystal_size_max           0.24
_exptl_crystal_size_mid           0.18
_exptl_crystal_size_min           0.13
_exptl_crystal_density_meas       ?
_exptl_crystal_density_diffrn     2.462
_exptl_crystal_density_method     'not measured'
_exptl_crystal_F_000              2384
_exptl_absorpt_coefficient_mu     11.914
_exptl_absorpt_correction_type    psi-scan
_exptl_absorpt_correction_T_min   0.04254
_exptl_absorpt_correction_T_max   0.09451
_exptl_absorpt_process_details
;
  Azimuthal psi-scans of 12 reflections at 10\% intervals.
  Data corrected with the program: XPREP, SHELXTL v. 5 (Siemens)
;
_exptl_special_details
;
  ?
;

_diffrn_ambient_temperature       173(2)
_diffrn_radiation_wavelength      0.71073
_diffrn_radiation_type            MoK\a
_diffrn_radiation_source          'normal focus Mo sealed tube'
_diffrn_radiation_monochromator   graphite
_diffrn_measurement_device        'four-circle diffractometer'
_diffrn_measurement_device_type   'Siemens-Stoe AED2'
_diffrn_measurement_method        '\w-2\q scans'
_diffrn_standards_number          3
_diffrn_standards_interval_time   55
_diffrn_standards_decay_%         'no decay'
_diffrn_reflns_number             6907
_diffrn_reflns_av_R_equivalents   0.0379
_diffrn_reflns_av_sigmaI/netI     0.0354
_diffrn_reflns_limit_h_min        -9
_diffrn_reflns_limit_h_max        9
_diffrn_reflns_limit_k_min        -3
_diffrn_reflns_limit_k_max        26
_diffrn_reflns_limit_l_min        -21
_diffrn_reflns_limit_l_max        23
_diffrn_reflns_theta_min          2.59
_diffrn_reflns_theta_max          24.99
_reflns_number_total              6026
_reflns_number_gt                 5057
_reflns_threshold_expression      >2sigma(I)
_diffrn_measured_fraction_theta_max    0.997
_diffrn_reflns_theta_full              24.99
_diffrn_measured_fraction_theta_full   0.997

_computing_data_collection        'DIF4 (Stoe)'
_computing_cell_refinement        'DIF4 (Stoe)'
_computing_data_reduction         'REDU4 (Stoe)'
_computing_structure_solution     'SIR92 (Giacovazzo, 1994)'
_computing_structure_refinement   'SHELXL-97 (Sheldrick, 1997)'
_computing_molecular_graphics     'XP, SHELXTL v.5 (Siemens)'
_computing_publication_material   'CIFTAB (Sheldrick, 1997)'

_refine_special_details
;
  Refinement of F^2^ against ALL reflections.  The weighted R-factor wR and
  goodness of fit S are based on F^2^, conventional R-factors R are based
  on F, with F set to zero for negative F^2^. The threshold expression of
  F^2^ > 2sigma(F^2^) is used only for calculating R-factors(gt) etc. and is
  not relevant to the choice of reflections for refinement.  R-factors based
  on F^2^ are statistically about twice as large as those based on F, and R-
  factors based on ALL data will be even larger.
;

_refine_ls_structure_factor_coef  Fsqd
_refine_ls_matrix_type            full
_refine_ls_weighting_scheme       calc
_refine_ls_weighting_details
  'calc w=1/[\s^2^(Fo^2^)+(0.0410P)^2^+44.6149P] where P=(Fo^2^+2Fc^2^)/3'
_atom_sites_solution_primary      direct
_atom_sites_solution_secondary    difmap
_atom_sites_solution_hydrogens    geom
_refine_ls_hydrogen_treatment     mixed
_refine_ls_extinction_method      none
_refine_ls_extinction_coef        ?
_refine_ls_number_reflns          6026
_refine_ls_number_parameters      436
_refine_ls_number_restraints      0
_refine_ls_R_factor_all           0.0467
_refine_ls_R_factor_gt            0.0354
_refine_ls_wR_factor_ref          0.0933
_refine_ls_wR_factor_gt           0.0861
_refine_ls_goodness_of_fit_ref    1.019
_refine_ls_restrained_S_all       1.019
_refine_ls_shift/su_max           0.001
_refine_ls_shift/su_mean          0.000
_refine_diff_density_max          1.834
_refine_diff_density_min         -1.405
_refine_diff_density_rms          0.203

loop_
  _atom_site_label
  _atom_site_type_symbol
  _atom_site_fract_x
  _atom_site_fract_y
  _atom_site_fract_z
  _atom_site_U_iso_or_equiv
  _atom_site_adp_type
  _atom_site_occupancy
  _atom_site_symmetry_multiplicity
  _atom_site_calc_flag
  _atom_site_refinement_flags
  _atom_site_disorder_assembly
  _atom_site_disorder_group
Ir1 Ir 0.63333(4) 0.164609(16) 0.158016(17) 0.02733(10) Uani 1 1 d . . .
Ir2 Ir 0.47659(4) 0.058142(16) 0.216874(17) 0.02657(10) Uani 1 1 d . . .
Ir3 Ir 0.76232(5) -0.018752(16) 0.363349(17) 0.02923(11) Uani 1 1 d . . .
S1 S 0.6811(3) 0.26520(11) 0.20876(13) 0.0396(6) Uani 1 1 d . . .
S2 S 0.7650(3) 0.04036(11) 0.26476(11) 0.0287(5) Uani 1 1 d . . .
S3 S 0.5833(3) 0.04573(12) 0.41552(12) 0.0364(5) Uani 1 1 d . . .
S4 S 0.3548(3) 0.15400(11) 0.18452(12) 0.0326(5) Uani 1 1 d . . .
N1 N 0.7597(10) 0.1606(3) 0.2545(4) 0.0291(17) Uani 1 1 d . . .
C1 C 0.7848(12) 0.2197(4) 0.2723(5) 0.033(2) Uani 1 1 d . . .
C2 C 0.8804(14) 0.2351(5) 0.3330(5) 0.046(3) Uani 1 1 d . . .
H2 H 0.8990 0.2763 0.3462 0.047(13) Uiso 1 1 calc R . .
C3 C 0.9476(13) 0.1874(5) 0.3737(5) 0.042(2) Uani 1 1 d . . .
H3 H 1.0143 0.1961 0.4155 0.047(13) Uiso 1 1 calc R . .
C4 C 0.9194(12) 0.1282(5) 0.3547(5) 0.037(2) Uani 1 1 d . . .
H4 H 0.9683 0.0964 0.3828 0.047(13) Uiso 1 1 calc R . .
C5 C 0.8196(12) 0.1146(4) 0.2945(5) 0.032(2) Uani 1 1 d . . .
N2 N 0.4544(9) 0.1129(3) 0.3021(4) 0.0291(17) Uani 1 1 d . . .
C6 C 0.4951(12) 0.1084(4) 0.3704(5) 0.032(2) Uani 1 1 d . . .
C7 C 0.4498(12) 0.1586(4) 0.4104(5) 0.033(2) Uani 1 1 d . . .
H7 H 0.4714 0.1565 0.4585 0.047(13) Uiso 1 1 calc R . .
C8 C 0.3761(13) 0.2097(5) 0.3811(6) 0.045(3) Uani 1 1 d . . .
H8 H 0.3536 0.2433 0.4088 0.047(13) Uiso 1 1 calc R . .
C9 C 0.3335(13) 0.2131(5) 0.3109(5) 0.038(2) Uani 1 1 d . . .
H9 H 0.2763 0.2472 0.2898 0.047(13) Uiso 1 1 calc R . .
C10 C 0.3794(12) 0.1641(5) 0.2744(5) 0.035(2) Uani 1 1 d . . .
C11 C 0.5512(14) 0.2122(5) 0.0619(5) 0.039(2) Uani 1 1 d . . .
H11 H 0.4568 0.2397 0.0756 0.038(8) Uiso 1 1 d R . .
C12 C 0.5274(13) 0.1506(5) 0.0510(5) 0.037(2) Uani 1 1 d . . .
H12 H 0.4090 0.1361 0.0400 0.038(8) Uiso 1 1 d R . .
C13 C 0.6432(13) 0.1121(5) 0.0104(5) 0.037(2) Uani 1 1 d . . .
H13A H 0.5739 0.0804 -0.0150 0.042(6) Uiso 1 1 calc R . .
H13B H 0.6913 0.1384 -0.0232 0.042(6) Uiso 1 1 calc R . .
C14 C 0.7879(13) 0.0818(5) 0.0550(5) 0.037(2) Uani 1 1 d . . .
H14A H 0.7523 0.0404 0.0667 0.042(6) Uiso 1 1 calc R . .
H14B H 0.8866 0.0778 0.0287 0.042(6) Uiso 1 1 calc R . .
C15 C 0.8419(11) 0.1162(4) 0.1197(5) 0.031(2) Uani 1 1 d . . .
H15 H 0.9008 0.0898 0.1596 0.038(8) Uiso 1 1 d R . .
C16 C 0.8773(12) 0.1792(5) 0.1214(5) 0.033(2) Uani 1 1 d . . .
H16 H 0.9802 0.1907 0.1596 0.038(8) Uiso 1 1 d R . .
C17 C 0.8692(13) 0.2187(5) 0.0581(5) 0.040(2) Uani 1 1 d . . .
H17A H 0.9580 0.2505 0.0652 0.042(6) Uiso 1 1 calc R . .
H17B H 0.8948 0.1933 0.0193 0.042(6) Uiso 1 1 calc R . .
C18 C 0.6982(15) 0.2491(5) 0.0404(5) 0.044(3) Uani 1 1 d . . .
H18A H 0.6798 0.2558 -0.0094 0.042(6) Uiso 1 1 calc R . .
H18B H 0.6997 0.2894 0.0627 0.042(6) Uiso 1 1 calc R . .
C19 C 0.5133(12) -0.0214(5) 0.1512(5) 0.036(2) Uani 1 1 d . . .
H19 H 0.6302 -0.0308 0.1517 0.038(8) Uiso 1 1 d R . .
C20 C 0.4087(13) 0.0193(4) 0.1146(5) 0.034(2) Uani 1 1 d . . .
H20 H 0.4497 0.0503 0.0805 0.038(8) Uiso 1 1 d R . .
C21 C 0.2142(13) 0.0148(5) 0.1022(5) 0.042(3) Uani 1 1 d . . .
H21A H 0.1675 0.0550 0.0874 0.042(6) Uiso 1 1 calc R . .
H21B H 0.1828 -0.0145 0.0649 0.042(6) Uiso 1 1 calc R . .
C22 C 0.1349(12) -0.0051(5) 0.1643(5) 0.041(2) Uani 1 1 d . . .
H22A H 0.1367 -0.0501 0.1668 0.042(6) Uiso 1 1 calc R . .
H22B H 0.0148 0.0081 0.1599 0.042(6) Uiso 1 1 calc R . .
C23 C 0.2259(12) 0.0206(5) 0.2294(5) 0.035(2) Uani 1 1 d . . .
H23 H 0.1814 0.0545 0.2490 0.038(8) Uiso 1 1 d R . .
C24 C 0.3514(13) -0.0134(5) 0.2691(5) 0.037(2) Uani 1 1 d . . .
H24 H 0.3550 0.0047 0.3151 0.038(8) Uiso 1 1 d R . .
C25 C 0.4030(13) -0.0758(4) 0.2518(5) 0.037(2) Uani 1 1 d . . .
H25A H 0.3077 -0.1039 0.2567 0.042(6) Uiso 1 1 calc R . .
H25B H 0.5001 -0.0884 0.2846 0.042(6) Uiso 1 1 calc R . .
C26 C 0.4538(13) -0.0815(5) 0.1798(5) 0.039(2) Uani 1 1 d . . .
H26A H 0.3554 -0.0969 0.1494 0.042(6) Uiso 1 1 calc R . .
H26B H 0.5462 -0.1118 0.1800 0.042(6) Uiso 1 1 calc R . .
C27 C 0.8501(14) -0.0955(5) 0.3109(5) 0.041(2) Uani 1 1 d . . .
H27 H 0.7972 -0.0931 0.2604 0.038(8) Uiso 1 1 d R . .
C28 C 0.9916(13) -0.0622(5) 0.3378(5) 0.040(2) Uani 1 1 d . . .
H28 H 1.0358 -0.0360 0.2999 0.038(8) Uiso 1 1 d R . .
C29 C 1.1125(13) -0.0773(5) 0.3997(5) 0.043(2) Uani 1 1 d . . .
H29A H 1.1869 -0.0419 0.4119 0.042(6) Uiso 1 1 calc R . .
H29B H 1.1853 -0.1118 0.3891 0.042(6) Uiso 1 1 calc R . .
C30 C 1.0161(14) -0.0941(5) 0.4605(5) 0.045(3) Uani 1 1 d . . .
H30A H 0.9941 -0.1384 0.4597 0.042(6) Uiso 1 1 calc R . .
H30B H 1.0886 -0.0846 0.5032 0.042(6) Uiso 1 1 calc R . .
C31 C 0.8489(15) -0.0607(5) 0.4603(5) 0.043(3) Uani 1 1 d . . .
H31 H 0.8436 -0.0335 0.4996 0.038(8) Uiso 1 1 d R . .
C32 C 0.6960(15) -0.0875(5) 0.4328(5) 0.045(3) Uani 1 1 d . . .
H32 H 0.5941 -0.0735 0.4515 0.038(8) Uiso 1 1 d R . .
C33 C 0.6884(15) -0.1505(5) 0.3985(6) 0.048(3) Uani 1 1 d . . .
H33A H 0.7221 -0.1817 0.4335 0.042(6) Uiso 1 1 calc R . .
H33B H 0.5695 -0.1589 0.3798 0.042(6) Uiso 1 1 calc R . .
C34 C 0.8008(16) -0.1567(5) 0.3417(6) 0.050(3) Uani 1 1 d . . .
H34A H 0.7412 -0.1819 0.3051 0.042(6) Uiso 1 1 calc R . .
H34B H 0.9059 -0.1784 0.3595 0.042(6) Uiso 1 1 calc R . .
B B 0.8647(16) -0.1395(6) 0.0807(6) 0.043(3) Uani 1 1 d . . .
F1 F 1.0435(7) -0.1346(3) 0.0875(3) 0.0496(15) Uani 1 1 d . . .
F2 F 0.8210(8) -0.1871(3) 0.0379(3) 0.0561(17) Uani 1 1 d . . .
F4 F 0.8167(10) -0.1519(4) 0.1438(4) 0.067(2) Uani 1 1 d . . .
F3 F 0.7958(11) -0.0863(3) 0.0542(4) 0.074(2) Uani 1 1 d . . .

loop_
  _atom_site_aniso_label
  _atom_site_aniso_U_11
  _atom_site_aniso_U_22
  _atom_site_aniso_U_33
  _atom_site_aniso_U_23
  _atom_site_aniso_U_13
  _atom_site_aniso_U_12
Ir1 0.02585(18) 0.0280(2) 0.02759(18) -0.00072(14) 0.00045(14) 0.00154(14)
Ir2 0.02319(18) 0.02798(19) 0.02847(18) -0.00409(14) 0.00252(13) -0.00066(13)
Ir3 0.03034(19) 0.0299(2) 0.02756(18) 0.00107(14) 0.00370(14) -0.00136(15)
S1 0.0464(15) 0.0283(12) 0.0430(14) -0.0026(10) 0.0009(11) 0.0006(11)
S2 0.0266(11) 0.0314(12) 0.0279(11) 0.0009(9) 0.0010(9) -0.0004(9)
S3 0.0427(14) 0.0393(14) 0.0274(11) -0.0002(10) 0.0056(10) 0.0026(11)
S4 0.0269(11) 0.0348(13) 0.0360(12) -0.0018(10) 0.0026(9) 0.0038(10)
N1 0.032(4) 0.031(4) 0.024(4) -0.001(3) 0.005(3) 0.001(3)
C1 0.031(5) 0.031(5) 0.036(5) -0.005(4) 0.004(4) -0.002(4)
C2 0.048(6) 0.046(6) 0.043(6) -0.011(5) 0.001(5) -0.013(5)
C3 0.042(6) 0.048(6) 0.033(5) -0.008(5) -0.005(4) -0.012(5)
C4 0.029(5) 0.051(6) 0.031(5) 0.007(4) 0.000(4) -0.006(5)
C5 0.032(5) 0.036(5) 0.029(5) -0.002(4) 0.006(4) -0.001(4)
N2 0.022(4) 0.033(4) 0.034(4) -0.004(3) 0.008(3) 0.003(3)
C6 0.029(5) 0.037(5) 0.032(5) -0.008(4) 0.011(4) -0.002(4)
C7 0.037(5) 0.025(5) 0.038(5) -0.005(4) 0.010(4) -0.001(4)
C8 0.039(6) 0.043(6) 0.054(7) -0.014(5) 0.012(5) 0.007(5)
C9 0.033(5) 0.033(5) 0.050(6) -0.003(4) 0.009(4) 0.002(4)
C10 0.032(5) 0.036(5) 0.035(5) 0.001(4) -0.003(4) -0.003(4)
C11 0.042(6) 0.037(6) 0.037(5) 0.009(4) -0.005(4) 0.002(5)
C12 0.032(5) 0.046(6) 0.030(5) -0.002(4) -0.005(4) 0.005(4)
C13 0.041(6) 0.043(6) 0.027(5) -0.008(4) 0.004(4) 0.007(5)
C14 0.043(6) 0.035(5) 0.034(5) 0.003(4) 0.005(4) 0.005(4)
C15 0.018(4) 0.040(5) 0.034(5) -0.005(4) 0.009(4) -0.001(4)
C16 0.031(5) 0.040(6) 0.029(5) 0.000(4) 0.005(4) 0.009(4)
C17 0.038(5) 0.041(6) 0.043(6) 0.000(5) 0.010(4) -0.004(5)
C18 0.065(7) 0.030(5) 0.037(5) 0.013(4) 0.002(5) 0.003(5)
C19 0.030(5) 0.037(5) 0.039(5) -0.018(4) -0.002(4) 0.009(4)
C20 0.038(5) 0.034(5) 0.032(5) -0.009(4) 0.006(4) -0.004(4)
C21 0.034(5) 0.044(6) 0.044(6) -0.013(5) -0.010(5) 0.006(5)
C22 0.027(5) 0.045(6) 0.048(6) -0.004(5) -0.001(4) 0.003(4)
C23 0.029(5) 0.033(5) 0.045(6) -0.007(4) 0.007(4) -0.002(4)
C24 0.035(5) 0.036(5) 0.038(5) 0.002(4) 0.001(4) 0.000(4)
C25 0.035(5) 0.025(5) 0.051(6) -0.002(4) 0.006(4) -0.003(4)
C26 0.033(5) 0.034(5) 0.049(6) -0.017(5) 0.001(4) 0.007(4)
C27 0.050(6) 0.035(6) 0.037(5) -0.008(4) 0.002(5) 0.006(5)
C28 0.038(6) 0.047(6) 0.036(5) 0.009(4) 0.010(4) 0.009(5)
C29 0.030(5) 0.049(6) 0.049(6) -0.003(5) 0.000(5) 0.010(5)
C30 0.050(6) 0.044(6) 0.037(5) 0.002(5) -0.008(5) 0.003(5)
C31 0.061(7) 0.041(6) 0.026(5) -0.002(4) 0.005(5) -0.014(5)
C32 0.052(6) 0.042(6) 0.045(6) 0.014(5) 0.022(5) -0.001(5)
C33 0.044(6) 0.038(6) 0.060(7) 0.010(5) -0.008(5) -0.012(5)
C34 0.060(7) 0.036(6) 0.052(7) -0.010(5) -0.004(6) 0.006(5)
B 0.038(6) 0.047(7) 0.042(6) 0.002(5) -0.003(5) 0.006(5)
F1 0.038(3) 0.053(4) 0.059(4) -0.005(3) 0.008(3) -0.009(3)
F2 0.049(4) 0.062(4) 0.056(4) -0.004(3) 0.001(3) -0.015(3)
F4 0.067(5) 0.082(5) 0.056(4) 0.008(4) 0.032(4) 0.012(4)
F3 0.082(5) 0.052(4) 0.084(5) 0.015(4) -0.010(4) 0.017(4)

_geom_special_details
;
  All esds (except the esd in the dihedral angle between two l.s. planes)
  are estimated using the full covariance matrix.  The cell esds are taken
  into account individually in the estimation of esds in distances, angles
  and torsion angles; correlations between esds in cell parameters are only
  used when they are defined by crystal symmetry.  An approximate (isotropic)
  treatment of cell esds is used for estimating esds involving l.s. planes.
;

loop_
  _geom_bond_atom_site_label_1
  _geom_bond_atom_site_label_2
  _geom_bond_distance
  _geom_bond_site_symmetry_2
  _geom_bond_publ_flag
Ir1 N1 2.057(7) . ?
Ir1 C16 2.163(10) . ?
Ir1 C15 2.172(9) . ?
Ir1 C11 2.205(9) . ?
Ir1 C12 2.211(9) . ?
Ir1 S4 2.336(2) . ?
Ir1 S1 2.442(3) . ?
Ir1 Ir2 2.9509(6) . ?
Ir2 N2 2.096(7) . ?
Ir2 C24 2.182(10) . ?
Ir2 C23 2.190(10) . ?
Ir2 C20 2.207(9) . ?
Ir2 C19 2.219(9) . ?
Ir2 S4 2.377(2) . ?
Ir2 S2 2.406(2) . ?
Ir3 C27 2.138(10) . ?
Ir3 C32 2.148(10) . ?
Ir3 C28 2.162(10) . ?
Ir3 C31 2.170(10) . ?
Ir3 S3 2.327(3) . ?
Ir3 S2 2.347(2) . ?
S1 C1 1.739(10) . ?
S2 C5 1.774(10) . ?
S3 C6 1.745(10) . ?
S4 C10 1.781(10) . ?
N1 C5 1.339(12) . ?
N1 C1 1.355(12) . ?
C1 C2 1.390(14) . ?
C2 C3 1.393(16) . ?
C3 C4 1.367(15) . ?
C4 C5 1.386(13) . ?
N2 C6 1.357(12) . ?
N2 C10 1.361(12) . ?
C6 C7 1.429(13) . ?
C7 C8 1.365(15) . ?
C8 C9 1.393(15) . ?
C9 C10 1.369(14) . ?
C11 C12 1.382(15) . ?
C11 C18 1.519(15) . ?
C12 C13 1.539(13) . ?
C13 C14 1.520(13) . ?
C14 C15 1.508(13) . ?
C15 C16 1.414(14) . ?
C16 C17 1.519(14) . ?
C17 C18 1.517(15) . ?
C19 C20 1.370(14) . ?
C19 C26 1.533(15) . ?
C20 C21 1.536(14) . ?
C21 C22 1.506(15) . ?
C22 C23 1.514(14) . ?
C23 C24 1.412(14) . ?
C24 C25 1.483(14) . ?
C25 C26 1.528(14) . ?
C27 C28 1.394(15) . ?
C27 C34 1.547(16) . ?
C28 C29 1.505(14) . ?
C29 C30 1.541(15) . ?
C30 C31 1.514(16) . ?
C31 C32 1.401(15) . ?
C32 C33 1.541(16) . ?
C33 C34 1.514(17) . ?
B F2 1.365(15) . ?
B F3 1.372(14) . ?
B F4 1.373(15) . ?
B F1 1.412(14) . ?

loop_
  _geom_angle_atom_site_label_1
  _geom_angle_atom_site_label_2
  _geom_angle_atom_site_label_3
  _geom_angle
  _geom_angle_site_symmetry_1
  _geom_angle_site_symmetry_3
  _geom_angle_publ_flag
N1 Ir1 C16 87.5(3) . . ?
N1 Ir1 C15 89.6(3) . . ?
C16 Ir1 C15 38.1(4) . . ?
N1 Ir1 C11 152.6(3) . . ?
C16 Ir1 C11 80.2(4) . . ?
C15 Ir1 C11 95.4(4) . . ?
N1 Ir1 C12 167.7(3) . . ?
C16 Ir1 C12 87.6(4) . . ?
C15 Ir1 C12 79.6(4) . . ?
C11 Ir1 C12 36.5(4) . . ?
N1 Ir1 S4 99.3(2) . . ?
C16 Ir1 S4 172.8(2) . . ?
C15 Ir1 S4 143.5(3) . . ?
C11 Ir1 S4 92.6(3) . . ?
C12 Ir1 S4 86.2(3) . . ?
N1 Ir1 S1 67.7(2) . . ?
C16 Ir1 S1 84.2(3) . . ?
C15 Ir1 S1 119.9(3) . . ?
C11 Ir1 S1 86.6(3) . . ?
C12 Ir1 S1 123.0(3) . . ?
S4 Ir1 S1 96.05(9) . . ?
N1 Ir1 Ir2 77.4(2) . . ?
C16 Ir1 Ir2 132.9(3) . . ?
C15 Ir1 Ir2 96.8(3) . . ?
C11 Ir1 Ir2 128.4(3) . . ?
C12 Ir1 Ir2 97.8(3) . . ?
S4 Ir1 Ir2 51.87(6) . . ?
S1 Ir1 Ir2 127.58(7) . . ?
N2 Ir2 C24 87.1(3) . . ?
N2 Ir2 C23 88.1(3) . . ?
C24 Ir2 C23 37.7(4) . . ?
N2 Ir2 C20 157.9(3) . . ?
C24 Ir2 C20 94.4(4) . . ?
C23 Ir2 C20 80.0(4) . . ?
N2 Ir2 C19 162.4(3) . . ?
C24 Ir2 C19 78.7(4) . . ?
C23 Ir2 C19 87.0(4) . . ?
C20 Ir2 C19 36.1(4) . . ?
N2 Ir2 S4 68.9(2) . . ?
C24 Ir2 S4 125.1(3) . . ?
C23 Ir2 S4 91.1(3) . . ?
C20 Ir2 S4 92.7(3) . . ?
C19 Ir2 S4 128.2(3) . . ?
N2 Ir2 S2 86.4(2) . . ?
C24 Ir2 S2 99.1(3) . . ?
C23 Ir2 S2 136.7(3) . . ?
C20 Ir2 S2 114.9(3) . . ?
C19 Ir2 S2 85.5(2) . . ?
S4 Ir2 S2 126.12(8) . . ?
N2 Ir2 Ir1 86.5(2) . . ?
C24 Ir2 Ir1 173.4(3) . . ?
C23 Ir2 Ir1 140.4(3) . . ?
C20 Ir2 Ir1 90.9(3) . . ?
C19 Ir2 Ir1 107.9(3) . . ?
S4 Ir2 Ir1 50.62(6) . . ?
S2 Ir2 Ir1 82.04(6) . . ?
C27 Ir3 C32 82.5(4) . . ?
C27 Ir3 C28 37.8(4) . . ?
C32 Ir3 C28 96.3(4) . . ?
C27 Ir3 C31 90.3(4) . . ?
C32 Ir3 C31 37.9(4) . . ?
C28 Ir3 C31 80.1(4) . . ?
C27 Ir3 S3 160.7(3) . . ?
C32 Ir3 S3 86.6(3) . . ?
C28 Ir3 S3 160.5(3) . . ?
C31 Ir3 S3 90.9(3) . . ?
C27 Ir3 S2 90.0(3) . . ?
C32 Ir3 S2 161.4(3) . . ?
C28 Ir3 S2 88.0(3) . . ?
C31 Ir3 S2 160.0(3) . . ?
S3 Ir3 S2 95.35(8) . . ?
C1 S1 Ir1 79.3(3) . . ?
C5 S2 Ir3 105.0(3) . . ?
C5 S2 Ir2 99.6(3) . . ?
Ir3 S2 Ir2 108.74(9) . . ?
C6 S3 Ir3 118.9(3) . . ?
C10 S4 Ir1 102.1(3) . . ?
C10 S4 Ir2 81.1(3) . . ?
Ir1 S4 Ir2 77.51(7) . . ?
C5 N1 C1 122.7(8) . . ?
C5 N1 Ir1 133.2(6) . . ?
C1 N1 Ir1 104.0(6) . . ?
N1 C1 C2 120.6(9) . . ?
N1 C1 S1 108.7(7) . . ?
C2 C1 S1 130.7(8) . . ?
C1 C2 C3 116.9(10) . . ?
C4 C3 C2 121.2(9) . . ?
C3 C4 C5 120.2(10) . . ?
N1 C5 C4 118.3(9) . . ?
N1 C5 S2 116.3(7) . . ?
C4 C5 S2 125.4(8) . . ?
C6 N2 C10 120.5(8) . . ?
C6 N2 Ir2 136.7(6) . . ?
C10 N2 Ir2 102.9(6) . . ?
N2 C6 C7 116.6(9) . . ?
N2 C6 S3 127.2(7) . . ?
C7 C6 S3 116.0(7) . . ?
C8 C7 C6 121.6(9) . . ?
C7 C8 C9 120.8(10) . . ?
C10 C9 C8 115.8(10) . . ?
N2 C10 C9 124.6(9) . . ?
N2 C10 S4 107.1(7) . . ?
C9 C10 S4 128.3(8) . . ?
C12 C11 C18 125.2(10) . . ?
C12 C11 Ir1 72.0(5) . . ?
C18 C11 Ir1 109.5(6) . . ?
C11 C12 C13 122.9(10) . . ?
C11 C12 Ir1 71.5(6) . . ?
C13 C12 Ir1 113.0(6) . . ?
C14 C13 C12 113.2(8) . . ?
C15 C14 C13 113.4(8) . . ?
C16 C15 C14 123.3(9) . . ?
C16 C15 Ir1 70.6(5) . . ?
C14 C15 Ir1 112.8(6) . . ?
C15 C16 C17 123.5(9) . . ?
C15 C16 Ir1 71.3(5) . . ?
C17 C16 Ir1 113.8(6) . . ?
C18 C17 C16 113.4(8) . . ?
C17 C18 C11 113.1(8) . . ?
C20 C19 C26 124.4(9) . . ?
C20 C19 Ir2 71.5(5) . . ?
C26 C19 Ir2 113.5(6) . . ?
C19 C20 C21 125.4(10) . . ?
C19 C20 Ir2 72.4(5) . . ?
C21 C20 Ir2 108.0(6) . . ?
C22 C21 C20 113.0(8) . . ?
C21 C22 C23 112.5(8) . . ?
C24 C23 C22 121.0(9) . . ?
C24 C23 Ir2 70.8(6) . . ?
C22 C23 Ir2 113.4(7) . . ?
C23 C24 C25 123.8(9) . . ?
C23 C24 Ir2 71.5(6) . . ?
C25 C24 Ir2 114.0(7) . . ?
C24 C25 C26 113.6(9) . . ?
C25 C26 C19 113.4(8) . . ?
C28 C27 C34 122.4(9) . . ?
C28 C27 Ir3 72.0(6) . . ?
C34 C27 Ir3 112.7(7) . . ?
C27 C28 C29 127.2(10) . . ?
C27 C28 Ir3 70.1(6) . . ?
C29 C28 Ir3 112.5(7) . . ?
C28 C29 C30 111.3(8) . . ?
C31 C30 C29 113.0(8) . . ?
C32 C31 C30 121.0(10) . . ?
C32 C31 Ir3 70.2(6) . . ?
C30 C31 Ir3 113.5(7) . . ?
C31 C32 C33 122.6(10) . . ?
C31 C32 Ir3 71.9(6) . . ?
C33 C32 Ir3 110.6(7) . . ?
C34 C33 C32 114.2(9) . . ?
C33 C34 C27 114.1(9) . . ?
F2 B F3 110.8(9) . . ?
F2 B F4 109.5(10) . . ?
F3 B F4 112.2(10) . . ?
F2 B F1 107.5(10) . . ?
F3 B F1 108.9(10) . . ?
F4 B F1 107.7(9) . . ?

loop_
  _geom_torsion_atom_site_label_1
  _geom_torsion_atom_site_label_2
  _geom_torsion_atom_site_label_3
  _geom_torsion_atom_site_label_4
  _geom_torsion
  _geom_torsion_site_symmetry_1
  _geom_torsion_site_symmetry_2
  _geom_torsion_site_symmetry_3
  _geom_torsion_site_symmetry_4
  _geom_torsion_publ_flag
N1 Ir1 Ir2 N2 47.3(3) . . . . ?
C16 Ir1 Ir2 N2 121.8(4) . . . . ?
C15 Ir1 Ir2 N2 135.4(3) . . . . ?
C11 Ir1 Ir2 N2 -122.2(4) . . . . ?
C12 Ir1 Ir2 N2 -144.2(3) . . . . ?
S4 Ir1 Ir2 N2 -65.4(2) . . . . ?
S1 Ir1 Ir2 N2 -1.2(2) . . . . ?
N1 Ir1 Ir2 C24 61(2) . . . . ?
C16 Ir1 Ir2 C24 135(2) . . . . ?
C15 Ir1 Ir2 C24 149(2) . . . . ?
C11 Ir1 Ir2 C24 -109(2) . . . . ?
C12 Ir1 Ir2 C24 -131(2) . . . . ?
S4 Ir1 Ir2 C24 -52(2) . . . . ?
S1 Ir1 Ir2 C24 12(2) . . . . ?
N1 Ir1 Ir2 C23 130.1(5) . . . . ?
C16 Ir1 Ir2 C23 -155.5(5) . . . . ?
C15 Ir1 Ir2 C23 -141.9(5) . . . . ?
C11 Ir1 Ir2 C23 -39.4(6) . . . . ?
C12 Ir1 Ir2 C23 -61.5(5) . . . . ?
S4 Ir1 Ir2 C23 17.4(4) . . . . ?
S1 Ir1 Ir2 C23 81.6(4) . . . . ?
N1 Ir1 Ir2 C20 -154.6(3) . . . . ?
C16 Ir1 Ir2 C20 -80.2(4) . . . . ?
C15 Ir1 Ir2 C20 -66.6(4) . . . . ?
C11 Ir1 Ir2 C20 35.9(5) . . . . ?
C12 Ir1 Ir2 C20 13.8(4) . . . . ?
S4 Ir1 Ir2 C20 92.7(3) . . . . ?
S1 Ir1 Ir2 C20 156.9(3) . . . . ?
N1 Ir1 Ir2 C19 -122.2(3) . . . . ?
C16 Ir1 Ir2 C19 -47.7(4) . . . . ?
C15 Ir1 Ir2 C19 -34.2(4) . . . . ?
C11 Ir1 Ir2 C19 68.3(5) . . . . ?
C12 Ir1 Ir2 C19 46.2(4) . . . . ?
S4 Ir1 Ir2 C19 125.1(3) . . . . ?
S1 Ir1 Ir2 C19 -170.7(3) . . . . ?
N1 Ir1 Ir2 S4 112.7(2) . . . . ?
C16 Ir1 Ir2 S4 -172.9(3) . . . . ?
C15 Ir1 Ir2 S4 -159.3(3) . . . . ?
C11 Ir1 Ir2 S4 -56.8(4) . . . . ?
C12 Ir1 Ir2 S4 -78.9(3) . . . . ?
S1 Ir1 Ir2 S4 64.21(11) . . . . ?
N1 Ir1 Ir2 S2 -39.6(2) . . . . ?
C16 Ir1 Ir2 S2 34.9(3) . . . . ?
C15 Ir1 Ir2 S2 48.5(2) . . . . ?
C11 Ir1 Ir2 S2 151.0(4) . . . . ?
C12 Ir1 Ir2 S2 128.9(3) . . . . ?
S4 Ir1 Ir2 S2 -152.24(9) . . . . ?
S1 Ir1 Ir2 S2 -88.03(10) . . . . ?
N1 Ir1 S1 C1 3.1(4) . . . . ?
C16 Ir1 S1 C1 -86.5(4) . . . . ?
C15 Ir1 S1 C1 -72.7(5) . . . . ?
C11 Ir1 S1 C1 -167.0(4) . . . . ?
C12 Ir1 S1 C1 -169.9(5) . . . . ?
S4 Ir1 S1 C1 100.7(3) . . . . ?
Ir2 Ir1 S1 C1 55.3(3) . . . . ?
C27 Ir3 S2 C5 -146.7(4) . . . . ?
C32 Ir3 S2 C5 147.1(10) . . . . ?
C28 Ir3 S2 C5 -109.0(4) . . . . ?
C31 Ir3 S2 C5 -55.8(10) . . . . ?
S3 Ir3 S2 C5 51.8(3) . . . . ?
C27 Ir3 S2 Ir2 107.4(3) . . . . ?
C32 Ir3 S2 Ir2 41.3(10) . . . . ?
C28 Ir3 S2 Ir2 145.2(3) . . . . ?
C31 Ir3 S2 Ir2 -161.7(9) . . . . ?
S3 Ir3 S2 Ir2 -54.05(10) . . . . ?
N2 Ir2 S2 C5 -40.6(4) . . . . ?
C24 Ir2 S2 C5 -127.1(4) . . . . ?
C23 Ir2 S2 C5 -124.1(5) . . . . ?
C20 Ir2 S2 C5 133.6(4) . . . . ?
C19 Ir2 S2 C5 155.1(4) . . . . ?
S4 Ir2 S2 C5 19.8(3) . . . . ?
Ir1 Ir2 S2 C5 46.3(3) . . . . ?
N2 Ir2 S2 Ir3 68.9(2) . . . . ?
C24 Ir2 S2 Ir3 -17.6(3) . . . . ?
C23 Ir2 S2 Ir3 -14.5(4) . . . . ?
C20 Ir2 S2 Ir3 -116.9(3) . . . . ?
C19 Ir2 S2 Ir3 -95.4(3) . . . . ?
S4 Ir2 S2 Ir3 129.37(10) . . . . ?
Ir1 Ir2 S2 Ir3 155.84(9) . . . . ?
C27 Ir3 S3 C6 -100.5(10) . . . . ?
C32 Ir3 S3 C6 -156.2(5) . . . . ?
C28 Ir3 S3 C6 104.4(9) . . . . ?
C31 Ir3 S3 C6 166.2(5) . . . . ?
S2 Ir3 S3 C6 5.2(4) . . . . ?
N1 Ir1 S4 C10 12.1(4) . . . . ?
C16 Ir1 S4 C10 -148(2) . . . . ?
C15 Ir1 S4 C10 114.1(5) . . . . ?
C11 Ir1 S4 C10 -143.1(4) . . . . ?
C12 Ir1 S4 C10 -179.1(4) . . . . ?
S1 Ir1 S4 C10 -56.2(3) . . . . ?
Ir2 Ir1 S4 C10 77.9(3) . . . . ?
N1 Ir1 S4 Ir2 -65.9(2) . . . . ?
C16 Ir1 S4 Ir2 134(2) . . . . ?
C15 Ir1 S4 Ir2 36.2(4) . . . . ?
C11 Ir1 S4 Ir2 138.9(3) . . . . ?
C12 Ir1 S4 Ir2 103.0(3) . . . . ?
S1 Ir1 S4 Ir2 -134.15(8) . . . . ?
N2 Ir2 S4 C10 -1.2(4) . . . . ?
C24 Ir2 S4 C10 69.0(5) . . . . ?
C23 Ir2 S4 C10 86.3(4) . . . . ?
C20 Ir2 S4 C10 166.4(4) . . . . ?
C19 Ir2 S4 C10 173.4(5) . . . . ?
S2 Ir2 S4 C10 -69.8(3) . . . . ?
Ir1 Ir2 S4 C10 -104.6(3) . . . . ?
N2 Ir2 S4 Ir1 103.4(2) . . . . ?
C24 Ir2 S4 Ir1 173.6(3) . . . . ?
C23 Ir2 S4 Ir1 -169.0(3) . . . . ?
C20 Ir2 S4 Ir1 -89.0(3) . . . . ?
C19 Ir2 S4 Ir1 -81.9(4) . . . . ?
S2 Ir2 S4 Ir1 34.83(11) . . . . ?
C16 Ir1 N1 C5 -95.5(9) . . . . ?
C15 Ir1 N1 C5 -57.4(9) . . . . ?
C11 Ir1 N1 C5 -158.4(9) . . . . ?
C12 Ir1 N1 C5 -29(2) . . . . ?
S4 Ir1 N1 C5 87.0(8) . . . . ?
S1 Ir1 N1 C5 179.7(9) . . . . ?
Ir2 Ir1 N1 C5 39.6(8) . . . . ?
C16 Ir1 N1 C1 80.7(6) . . . . ?
C15 Ir1 N1 C1 118.8(6) . . . . ?
C11 Ir1 N1 C1 17.8(11) . . . . ?
C12 Ir1 N1 C1 147.4(15) . . . . ?
S4 Ir1 N1 C1 -96.8(6) . . . . ?
S1 Ir1 N1 C1 -4.1(5) . . . . ?
Ir2 Ir1 N1 C1 -144.2(6) . . . . ?
C5 N1 C1 C2 2.1(14) . . . . ?
Ir1 N1 C1 C2 -174.6(8) . . . . ?
C5 N1 C1 S1 -177.7(7) . . . . ?
Ir1 N1 C1 S1 5.6(7) . . . . ?
Ir1 S1 C1 N1 -4.6(6) . . . . ?
Ir1 S1 C1 C2 175.6(11) . . . . ?
N1 C1 C2 C3 0.1(15) . . . . ?
S1 C1 C2 C3 179.9(8) . . . . ?
C1 C2 C3 C4 -0.4(16) . . . . ?
C2 C3 C4 C5 -1.3(16) . . . . ?
C1 N1 C5 C4 -3.8(14) . . . . ?
Ir1 N1 C5 C4 171.8(7) . . . . ?
C1 N1 C5 S2 176.9(7) . . . . ?
Ir1 N1 C5 S2 -7.5(12) . . . . ?
C3 C4 C5 N1 3.3(14) . . . . ?
C3 C4 C5 S2 -177.5(8) . . . . ?
Ir3 S2 C5 N1 -151.4(6) . . . . ?
Ir2 S2 C5 N1 -38.9(7) . . . . ?
Ir3 S2 C5 C4 29.4(9) . . . . ?
Ir2 S2 C5 C4 141.9(8) . . . . ?
C24 Ir2 N2 C6 52.4(9) . . . . ?
C23 Ir2 N2 C6 90.1(9) . . . . ?
C20 Ir2 N2 C6 147.2(10) . . . . ?
C19 Ir2 N2 C6 16.0(16) . . . . ?
S4 Ir2 N2 C6 -178.0(9) . . . . ?
S2 Ir2 N2 C6 -46.9(9) . . . . ?
Ir1 Ir2 N2 C6 -129.1(9) . . . . ?
C24 Ir2 N2 C10 -128.0(6) . . . . ?
C23 Ir2 N2 C10 -90.3(6) . . . . ?
C20 Ir2 N2 C10 -33.2(12) . . . . ?
C19 Ir2 N2 C10 -164.4(10) . . . . ?
S4 Ir2 N2 C10 1.6(5) . . . . ?
S2 Ir2 N2 C10 132.7(6) . . . . ?
Ir1 Ir2 N2 C10 50.5(5) . . . . ?
C10 N2 C6 C7 2.1(13) . . . . ?
Ir2 N2 C6 C7 -178.3(7) . . . . ?
C10 N2 C6 S3 177.2(7) . . . . ?
Ir2 N2 C6 S3 -3.3(14) . . . . ?
Ir3 S3 C6 N2 30.7(10) . . . . ?
Ir3 S3 C6 C7 -154.3(6) . . . . ?
N2 C6 C7 C8 -2.8(14) . . . . ?
S3 C6 C7 C8 -178.4(8) . . . . ?
C6 C7 C8 C9 3.7(16) . . . . ?
C7 C8 C9 C10 -3.7(15) . . . . ?
C6 N2 C10 C9 -2.5(14) . . . . ?
Ir2 N2 C10 C9 177.8(9) . . . . ?
C6 N2 C10 S4 177.6(7) . . . . ?
Ir2 N2 C10 S4 -2.1(7) . . . . ?
C8 C9 C10 N2 3.2(15) . . . . ?
C8 C9 C10 S4 -176.9(8) . . . . ?
Ir1 S4 C10 N2 -73.2(6) . . . . ?
Ir2 S4 C10 N2 1.8(6) . . . . ?
Ir1 S4 C10 C9 106.8(9) . . . . ?
Ir2 S4 C10 C9 -178.1(10) . . . . ?
N1 Ir1 C11 C12 163.9(7) . . . . ?
C16 Ir1 C11 C12 99.3(7) . . . . ?
C15 Ir1 C11 C12 64.3(7) . . . . ?
S4 Ir1 C11 C12 -80.0(6) . . . . ?
S1 Ir1 C11 C12 -175.9(6) . . . . ?
Ir2 Ir1 C11 C12 -38.8(8) . . . . ?
N1 Ir1 C11 C18 42.1(12) . . . . ?
C16 Ir1 C11 C18 -22.5(7) . . . . ?
C15 Ir1 C11 C18 -57.5(8) . . . . ?
C12 Ir1 C11 C18 -121.8(11) . . . . ?
S4 Ir1 C11 C18 158.1(7) . . . . ?
S1 Ir1 C11 C18 62.2(7) . . . . ?
Ir2 Ir1 C11 C18 -160.6(6) . . . . ?
C18 C11 C12 C13 -4.4(15) . . . . ?
Ir1 C11 C12 C13 -106.0(9) . . . . ?
C18 C11 C12 Ir1 101.6(9) . . . . ?
N1 Ir1 C12 C11 -143.3(15) . . . . ?
C16 Ir1 C12 C11 -76.7(7) . . . . ?
C15 Ir1 C12 C11 -114.2(7) . . . . ?
S4 Ir1 C12 C11 99.6(6) . . . . ?
S1 Ir1 C12 C11 4.9(7) . . . . ?
Ir2 Ir1 C12 C11 150.3(6) . . . . ?
N1 Ir1 C12 C13 -25(2) . . . . ?
C16 Ir1 C12 C13 42.0(8) . . . . ?
C15 Ir1 C12 C13 4.5(7) . . . . ?
C11 Ir1 C12 C13 118.7(10) . . . . ?
S4 Ir1 C12 C13 -141.7(7) . . . . ?
S1 Ir1 C12 C13 123.5(7) . . . . ?
Ir2 Ir1 C12 C13 -91.1(7) . . . . ?
C11 C12 C13 C14 93.3(12) . . . . ?
Ir1 C12 C13 C14 11.1(11) . . . . ?
C12 C13 C14 C15 -27.8(13) . . . . ?
C13 C14 C15 C16 -49.4(13) . . . . ?
C13 C14 C15 Ir1 31.6(11) . . . . ?
N1 Ir1 C15 C16 -86.5(6) . . . . ?
C11 Ir1 C15 C16 66.5(6) . . . . ?
C12 Ir1 C15 C16 99.4(6) . . . . ?
S4 Ir1 C15 C16 168.3(4) . . . . ?
S1 Ir1 C15 C16 -22.8(6) . . . . ?
Ir2 Ir1 C15 C16 -163.8(5) . . . . ?
N1 Ir1 C15 C14 154.6(7) . . . . ?
C16 Ir1 C15 C14 -118.9(9) . . . . ?
C11 Ir1 C15 C14 -52.4(7) . . . . ?
C12 Ir1 C15 C14 -19.4(7) . . . . ?
S4 Ir1 C15 C14 49.4(9) . . . . ?
S1 Ir1 C15 C14 -141.7(6) . . . . ?
Ir2 Ir1 C15 C14 77.3(7) . . . . ?
C14 C15 C16 C17 -1.6(14) . . . . ?
Ir1 C15 C16 C17 -106.7(9) . . . . ?
C14 C15 C16 Ir1 105.1(8) . . . . ?
N1 Ir1 C16 C15 92.5(6) . . . . ?
C11 Ir1 C16 C15 -112.1(6) . . . . ?
C12 Ir1 C16 C15 -76.2(6) . . . . ?
S4 Ir1 C16 C15 -107(2) . . . . ?
S1 Ir1 C16 C15 160.3(5) . . . . ?
Ir2 Ir1 C16 C15 22.2(7) . . . . ?
N1 Ir1 C16 C17 -148.4(7) . . . . ?
C15 Ir1 C16 C17 119.2(10) . . . . ?
C11 Ir1 C16 C17 7.0(7) . . . . ?
C12 Ir1 C16 C17 43.0(7) . . . . ?
S4 Ir1 C16 C17 12(3) . . . . ?
S1 Ir1 C16 C17 -80.6(7) . . . . ?
Ir2 Ir1 C16 C17 141.4(6) . . . . ?
C15 C16 C17 C18 92.8(11) . . . . ?
Ir1 C16 C17 C18 10.1(11) . . . . ?
C16 C17 C18 C11 -30.2(13) . . . . ?
C12 C11 C18 C17 -46.3(14) . . . . ?
Ir1 C11 C18 C17 35.0(11) . . . . ?
N2 Ir2 C19 C20 151.3(9) . . . . ?
C24 Ir2 C19 C20 114.1(6) . . . . ?
C23 Ir2 C19 C20 77.0(6) . . . . ?
S4 Ir2 C19 C20 -12.1(7) . . . . ?
S2 Ir2 C19 C20 -145.7(6) . . . . ?
Ir1 Ir2 C19 C20 -65.6(6) . . . . ?
N2 Ir2 C19 C26 30.9(15) . . . . ?
C24 Ir2 C19 C26 -6.3(7) . . . . ?
C23 Ir2 C19 C26 -43.3(7) . . . . ?
C20 Ir2 C19 C26 -120.3(10) . . . . ?
S4 Ir2 C19 C26 -132.4(6) . . . . ?
S2 Ir2 C19 C26 94.0(6) . . . . ?
Ir1 Ir2 C19 C26 174.1(6) . . . . ?
C26 C19 C20 C21 6.3(15) . . . . ?
Ir2 C19 C20 C21 -100.0(9) . . . . ?
C26 C19 C20 Ir2 106.3(9) . . . . ?
N2 Ir2 C20 C19 -157.2(8) . . . . ?
C24 Ir2 C20 C19 -63.9(6) . . . . ?
C23 Ir2 C20 C19 -98.8(7) . . . . ?
S4 Ir2 C20 C19 170.5(6) . . . . ?
S2 Ir2 C20 C19 38.3(7) . . . . ?
Ir1 Ir2 C20 C19 119.9(6) . . . . ?
N2 Ir2 C20 C21 -34.8(13) . . . . ?
C24 Ir2 C20 C21 58.5(7) . . . . ?
C23 Ir2 C20 C21 23.6(7) . . . . ?
C19 Ir2 C20 C21 122.4(10) . . . . ?
S4 Ir2 C20 C21 -67.0(7) . . . . ?
S2 Ir2 C20 C21 160.7(6) . . . . ?
Ir1 Ir2 C20 C21 -117.7(7) . . . . ?
C19 C20 C21 C22 41.3(14) . . . . ?
Ir2 C20 C21 C22 -39.6(10) . . . . ?
C20 C21 C22 C23 36.5(12) . . . . ?
C21 C22 C23 C24 -95.8(12) . . . . ?
C21 C22 C23 Ir2 -14.8(11) . . . . ?
N2 Ir2 C23 C24 -87.7(6) . . . . ?
C20 Ir2 C23 C24 111.0(6) . . . . ?
C19 Ir2 C23 C24 75.3(6) . . . . ?
S4 Ir2 C23 C24 -156.5(6) . . . . ?
S2 Ir2 C23 C24 -4.9(8) . . . . ?
Ir1 Ir2 C23 C24 -169.9(5) . . . . ?
N2 Ir2 C23 C22 156.0(7) . . . . ?
C24 Ir2 C23 C22 -116.3(10) . . . . ?
C20 Ir2 C23 C22 -5.4(7) . . . . ?
C19 Ir2 C23 C22 -41.0(7) . . . . ?
S4 Ir2 C23 C22 87.2(7) . . . . ?
S2 Ir2 C23 C22 -121.3(7) . . . . ?
Ir1 Ir2 C23 C22 73.8(8) . . . . ?
C22 C23 C24 C25 -0.6(15) . . . . ?
Ir2 C23 C24 C25 -106.9(10) . . . . ?
C22 C23 C24 Ir2 106.3(9) . . . . ?
N2 Ir2 C24 C23 90.7(6) . . . . ?
C20 Ir2 C24 C23 -67.3(6) . . . . ?
C19 Ir2 C24 C23 -99.9(6) . . . . ?
S4 Ir2 C24 C23 29.2(7) . . . . ?
S2 Ir2 C24 C23 176.6(5) . . . . ?
Ir1 Ir2 C24 C23 77(2) . . . . ?
N2 Ir2 C24 C25 -149.7(7) . . . . ?
C23 Ir2 C24 C25 119.6(10) . . . . ?
C20 Ir2 C24 C25 52.3(7) . . . . ?
C19 Ir2 C24 C25 19.7(7) . . . . ?
S4 Ir2 C24 C25 148.8(6) . . . . ?
S2 Ir2 C24 C25 -63.8(7) . . . . ?
Ir1 Ir2 C24 C25 -163.2(18) . . . . ?
C23 C24 C25 C26 53.1(13) . . . . ?
Ir2 C24 C25 C26 -29.9(10) . . . . ?
C24 C25 C26 C19 24.2(12) . . . . ?
C20 C19 C26 C25 -90.5(11) . . . . ?
Ir2 C19 C26 C25 -7.5(10) . . . . ?
C32 Ir3 C27 C28 -110.5(7) . . . . ?
C31 Ir3 C27 C28 -73.3(6) . . . . ?
S3 Ir3 C27 C28 -166.8(7) . . . . ?
S2 Ir3 C27 C28 86.6(6) . . . . ?
C32 Ir3 C27 C34 7.8(8) . . . . ?
C28 Ir3 C27 C34 118.3(10) . . . . ?
C31 Ir3 C27 C34 45.0(8) . . . . ?
S3 Ir3 C27 C34 -48.5(13) . . . . ?
S2 Ir3 C27 C34 -155.0(7) . . . . ?
C34 C27 C28 C29 -2.3(17) . . . . ?
Ir3 C27 C28 C29 103.7(11) . . . . ?
C34 C27 C28 Ir3 -106.0(10) . . . . ?
C32 Ir3 C28 C27 69.1(7) . . . . ?
C31 Ir3 C28 C27 103.5(7) . . . . ?
S3 Ir3 C28 C27 166.9(7) . . . . ?
S2 Ir3 C28 C27 -92.7(6) . . . . ?
C27 Ir3 C28 C29 -123.1(11) . . . . ?
C32 Ir3 C28 C29 -54.0(8) . . . . ?
C31 Ir3 C28 C29 -19.7(8) . . . . ?
S3 Ir3 C28 C29 43.8(14) . . . . ?
S2 Ir3 C28 C29 144.2(8) . . . . ?
C27 C28 C29 C30 -48.1(15) . . . . ?
Ir3 C28 C29 C30 33.4(11) . . . . ?
C28 C29 C30 C31 -31.8(13) . . . . ?
C29 C30 C31 C32 95.7(12) . . . . ?
C29 C30 C31 Ir3 15.4(11) . . . . ?
C27 Ir3 C31 C32 -77.4(7) . . . . ?
C28 Ir3 C31 C32 -114.0(7) . . . . ?
S3 Ir3 C31 C32 83.3(6) . . . . ?
S2 Ir3 C31 C32 -168.3(7) . . . . ?
C27 Ir3 C31 C30 38.7(8) . . . . ?
C32 Ir3 C31 C30 116.1(11) . . . . ?
C28 Ir3 C31 C30 2.1(8) . . . . ?
S3 Ir3 C31 C30 -160.5(7) . . . . ?
S2 Ir3 C31 C30 -52.1(13) . . . . ?
C30 C31 C32 C33 -2.8(15) . . . . ?
Ir3 C31 C32 C33 103.3(10) . . . . ?
C30 C31 C32 Ir3 -106.2(9) . . . . ?
C27 Ir3 C32 C31 100.2(7) . . . . ?
C28 Ir3 C32 C31 64.8(7) . . . . ?
S3 Ir3 C32 C31 -95.8(6) . . . . ?
S2 Ir3 C32 C31 167.4(8) . . . . ?
C27 Ir3 C32 C33 -18.7(8) . . . . ?
C28 Ir3 C32 C33 -54.0(8) . . . . ?
C31 Ir3 C32 C33 -118.9(11) . . . . ?
S3 Ir3 C32 C33 145.3(8) . . . . ?
S2 Ir3 C32 C33 48.5(15) . . . . ?
C31 C32 C33 C34 -54.2(14) . . . . ?
Ir3 C32 C33 C34 27.0(12) . . . . ?
C32 C33 C34 C27 -21.1(14) . . . . ?
C28 C27 C34 C33 87.4(13) . . . . ?
Ir3 C27 C34 C33 4.9(12) . . . . ?

#===END
